# Supplementary material
Source: PubMed Central journal article supplement (PMC10530193)
Supplement: NIHMS1919743-supplement-Supplemental_Publication_Material.pdf [file NIHMS1919743-supplement-Supplemental_Publication_Material.pdf]

## SUPPLEMENTAL MATERIAL

**Figure S1.** Engagement practice score by site (Method 2)

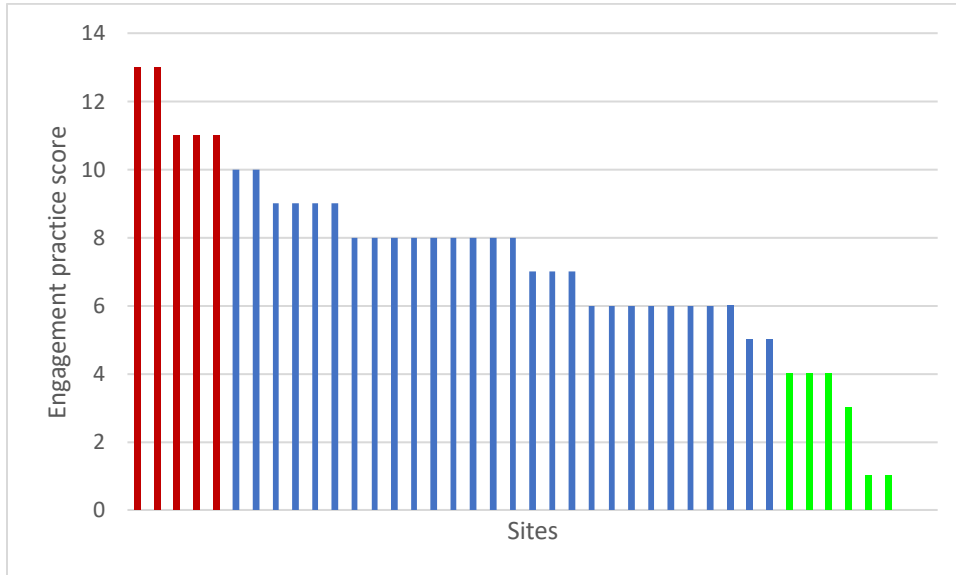

**Legend.**

Each bar represents one site in the Cardiac Critical Care Trials Network. The sites are arranged with the highest engagement practice score on the left to the lowest score on the right.

**Table S1.** World Federation of Societies of Intensive and Critical Care Medicine Family Engagement Survey

| <b>Instructions:</b>                                                                                                                             |                                                                                                                                                                                       |            |                  |               |
|--------------------------------------------------------------------------------------------------------------------------------------------------|---------------------------------------------------------------------------------------------------------------------------------------------------------------------------------------|------------|------------------|---------------|
| A number of types of patient and family centered care or engagement practices have been identified in the literature to improve care in the ICU. |                                                                                                                                                                                       |            |                  |               |
| To what extent have you adopted the following Patient and Family Centered Care practices in your ICU?                                            |                                                                                                                                                                                       |            |                  |               |
|                                                                                                                                                  |                                                                                                                                                                                       | Not at all | Somewhat adopted | Fully adopted |
| 1                                                                                                                                                | Structured patient and family care conferences to mutually establish or review the goals of care for all patients with high risk of mortality or prolonged ICU stay                   |            |                  |               |
| 2                                                                                                                                                | Family participation in rounds (family-centered rounds that enable the family member to listen to rounds and participate by offering information and/or asking questions)             |            |                  |               |
| 3                                                                                                                                                | Patient and/or family ICU diaries                                                                                                                                                     |            |                  |               |
| 4                                                                                                                                                | Integrative therapies, such as music or pets, in the ICU                                                                                                                              |            |                  |               |
| 5                                                                                                                                                | A functioning patient and family advisory group that meets regularly                                                                                                                  |            |                  |               |
| 6                                                                                                                                                | Disseminating information and providing support to families about ways to assist with the care of their loved one (i.e., providing assistance with oral care, mobility, or nutrition) |            |                  |               |
| 7                                                                                                                                                | Open visitation (flexible family presence or non-restricted ICU hours)                                                                                                                |            |                  |               |
| 8                                                                                                                                                | Family presence during resuscitation                                                                                                                                                  |            |                  |               |
| 9                                                                                                                                                | Family presence during invasive procedures                                                                                                                                            |            |                  |               |
| 10                                                                                                                                               | Does your hospital utilize any additional patient and family centered care or practices?                                                                                              |            |                  |               |
| 11                                                                                                                                               | What are strategies that you and your colleagues have found helpful to promote patient and family centered care/engagement in the ICU?                                                |            |                  |               |
| 12                                                                                                                                               | What are potential barriers have you encountered in implementing patient and family centered care/engagement in the ICU?                                                              |            |                  |               |

**Legend.** Abbreviations. ICU, Intensive care unit
